# Supplementary material
Source: publisher site journal article supplement (https://www.dovepress.com/article/325943)
Supplement: Supplementary file 1 [file get_supplementary_file.php]

Table I. Clinical strains of *Serrati*a spp. – source and presence of integrons

|  | species | source | int1 | int2 | int3 |
| --- | --- | --- | --- | --- | --- |
| 1 | *S. marcescens* | no data |  |  |  |
| 2 | *S. marcescens* | no data |  |  |  |
| 3 | *S. marcescens* | urine |  |  |  |
| 4 | *S. marcescens* | respiratory tract |  |  |  |
| 5 | *S. marcescens* | stoma |  |  |  |
| 6 | *S. marcescens* | urine |  |  |  |
| 7 | *S. marcescens* | catheter |  |  |  |
| 8 | *S. liquefaciens* | wound |  |  |  |
| 9 | *S. marcescens* | blood |  |  |  |
| 10 | *S. marcescens* | respiratory tract |  |  |  |
| 11 | *S. marcescens* | wound |  |  |  |
| 12 | *S. liquefaciens* | wound |  |  |  |
| 13 | *S. liquefaciens* | wound |  |  |  |
| 14 | *S. marcescens* | eye |  |  |  |
| 15 | *S. marcescens* | eye |  |  |  |
| 16 | *S. marcescens* | respiratory tract | **+** | **+** |  |
| 18 | *S. marcescens* | respiratory tract | **+** | **+** |  |
| 19 | *S. marcescens* | wound |  |  |  |
| 21 | *S. marcescens* | wound |  |  |  |
| 22 | *S. marcescens* | wound | **+** | **+** |  |
| 23 | *S. marcescens* | respiratory tract |  |  |  |
| 24 | *S. marcescens* | respiratory tract |  |  |  |
| 25 | *S. marcescens* | respiratory tract |  |  |  |
| 27 | *S. marcescens* | wound | **+** | **+** |  |
| 28 | *S. marcescens* | wound | **+** | **+** |  |
| 29 | *S. marcescens* | wound |  |  |  |
| 31 | *S. marcescens* | nose | **+** |  |  |
| 32 | *S. marcescens* | respiratory tract | **+** |  |  |
| 33 | *S. marcescens* | wound | **+** |  |  |
| 34 | *S. marcescens* | urine |  |  |  |
| 35 | *S. marcescens* | respiratory tract |  |  |  |
| 36 | *S. marcescens* | respiratory tract |  |  |  |
| 37 | *S. marcescens* | respiratory tract |  |  |  |
| 38 | *S. marcescens* | blood |  |  |  |
| 39 | *S. marcescens* | blood |  |  |  |
| 40 | *S. marcescens* | respiratory tract | **+** |  |  |
| 41 | *S. marcescens* | respiratory tract | **+** |  |  |
| 42 | *S. marcescens* | blood |  |  |  |
| 43 | *S. marcescens* | respiratory tract |  | **+** |  |
| 44 | *S. marcescens* | nose | **+** |  |  |
| 45 | *S. marcescens* | stoma |  |  |  |
| 46 | *S. marcescens* | respiratory tract |  |  |  |
| 47 | *S. marcescens* | wound |  |  |  |
| 48 | *S. marcescens* | eye |  |  |  |
| 49 | *S. marcescens* | respiratory tract |  |  |  |
| 50 | *S. marcescens* | respiratory tract |  |  |  |
| 51 | *S. marcescens* | respiratory tract |  |  |  |
| 53 | *S. fonticola* | wound |  |  |  |
| 54 | *S. marcescens* | wound | **+** | **+** |  |
| 55 | *S. marcescens* | wound |  |  |  |
| 56 | *S. marcescens* | no data |  |  |  |
| 57 | *S. marcescens* | urine |  |  |  |
| 58 | *S. marcescens* | wound |  |  |  |
| 59 | *S. marcescens* | urine |  |  |  |
| 60 | *S. marcescens* | urine |  |  |  |
| 61 | *S. marcescens* | wound | **+** | **+** |  |
| 62 | *S. marcescens* | respiratory tract |  |  |  |
| 63 | *S. marcescens* | urine |  |  |  |
| 64 | *S. marcescens* | urine | **+** |  |  |
| 65 | *S. marcescens* | urine |  |  |  |
| 66 | *S. marcescens* | wound | **+** | **+** |  |
| 67 | *S. marcescens* | respiratory tract |  |  |  |
| 68 | *S. marcescens* | respiratory tract |  |  |  |
| 69 | *S. liquefaciens* | respiratory tract |  |  |  |
| 70 | *S. marcescens* | urine |  |  |  |
| 71 | *S. liquefaciens* | anus |  |  |  |
| 72 | *S. marcescens* | respiratory tract |  |  |  |
| 73 | *S. marcescens* | wound |  |  |  |
| 74 | *S. marcescens* | urine |  |  |  |
| 75 | *S. marcescens* | urine |  |  |  |
| 77 | *S. marcescens* | urine |  |  |  |
| 78 | *S. marcescens* | urine |  |  |  |
| 79 | *S. liquefaciens* | wound |  |  |  |
| 80 | *S. marcescens* | wound |  |  |  |
| 81 | *S. marcescens* | urine | **+** |  |  |
| 82 | *S. marcescens* | urine | **+** |  |  |
| 83 | *S. marcescens* | no data | **+** |  |  |
| 84 | *S. marcescens* | blood |  |  |  |
| 85 | *S. marcescens* | no data | **+** | **+** |  |
| 86 | *S. marcescens* | wound |  |  |  |
| 87 | *S. marcescens* | no data | **+** |  |  |
| 88 | *S. marcescens* | urine |  |  |  |
| 89 | *S. marcescens* | urine |  |  | **+** |
| 90 | *S. marcescens* | no data | **+** |  |  |
| 91 | *S. marcescens* | no data | **+** |  |  |
| 92 | *S. marcescens* | wound |  |  |  |
| 93 | *S. marcescens* | no data |  |  |  |
| 94 | *S. marcescens* | respiratory tract |  |  |  |
| 95 | *S. marcescens* | wound |  |  |  |
| 96 | *S. marcescens* | urine | **+** |  |  |
| 97 | *S. marcescens* | no data |  |  |  |
| 98 | *S. marcescens* | urine | **+** |  |  |
| 99 | *S. marcescens* | no data | **+** |  |  |
| 100 | *S. marcescens* | wound |  |  |  |
| 101 | *S. liquefaciens* | no data |  |  |  |
| 103 | *S. marcescens* | urine |  |  |  |
| 104 | *S. ureilytica* | urine |  |  |  |
| 105 | *S. marcescens* | urine | **+** |  |  |
| 107 | *S. marcescens* | urine |  |  |  |
| 108 | *S. marcescens* | respiratory tract |  |  |  |
| 109 | *S. marcescens* | respiratory tract |  |  |  |
| 110 | *S. marcescens* | fistula |  |  |  |
| 111 | *S. marcescens* | wound |  |  |  |
| 112 | *S. marcescens* | stoma |  |  |  |
| 113 | *S. marcescens* | respiratory tract |  |  |  |
| 114 | *S. marcescens* | respiratory tract |  |  |  |
| 115 | *S. marcescens* | respiratory tract |  |  |  |
| 116 | *S. marcescens* | respiratory tract |  |  |  |
| 117 | *S. marcescens* | nose |  |  |  |
| 118 | *S. marcescens* | respiratory tract |  |  |  |
| 119 | *S. marcescens* | urine |  |  |  |
| 120 | *S. marcescens* | respiratory tract |  |  |  |

INT1 – integron class 1, INT2 – integron class 2, INT3 – integron class 3

Table II. Clinical strains of *Serratia* spp. – MIC values of selected antibiotics

|  | Piperacillin-tazobactam | Cefotaxime | Ceftazidime | Cefepime | Ertapenem | Imipenem | Meropenem | Amikacin | Gentamicin | TobramYcin | Ciprofloxacin | TigecyclinE |
| --- | --- | --- | --- | --- | --- | --- | --- | --- | --- | --- | --- | --- |
| 1 | 64 | 8 | ≤1 | ≤1 | ≤0,5 | 1 | ≤0,25 | ≤2 | ≤1 | ≤1 | 0,5 | 2 |
| 2 | ≤4 | ≤1 | ≤1 | ≤1 | ≤0,5 | 0,5 | ≤0,25 | ≤2 | ≤1 | 2 | ≤0,25 | 2 |
| 3 | b.d. | ≤1 | ≤1 | ≤1 | ≤0,5 | 2 | ≤0,25 | ≤2 | ≤1 | ≤1 | ≤0,25 | ≤0,5 |
| 4 | ≤4 | ≤1 | ≤1 | ≤1 | ≤0,5 | 1 | ≤0,25 | ≤2 | ≤1 | ≤1 | ≤0,25 | 2 |
| 5 | ≤4 | ≤1 | ≤1 | ≤1 | ≤0,5 | 1 | ≤0,25 | ≤2 | ≤1 | ≤1 | ≤0,25 | 2 |
| 6 | ≤4 | ≤1 | ≤1 | ≤1 | ≤0,5 | 0,5 | ≤0,25 | ≤2 | ≤1 | ≤1 | ≤0,25 | 2 |
| 7 | ≤4 | ≤1 | ≤1 | ≤1 | ≤0,5 | 1 | ≤0,25 | ≤2 | ≤1 | ≤1 | ≤0,25 | 2 |
| 8 | ≤4 | ≤1 | ≤1 | ≤1 | ≤0,5 | 0,5 | ≤0,25 | ≤2 | ≤1 | ≤1 | ≤0,25 | 2 |
| 9 | ≤4 | ≤1 | ≤1 | ≤1 | ≤0,5 | 1 | ≤0,25 | ≤2 | ≤1 | ≤1 | ≤0,25 | 2 |
| 10 | ≤4 | ≤1 | ≤1 | ≤1 | ≤0,5 | 0,5 | ≤0,25 | 4 | ≤1 | 8 | ≤0,25 | 2 |
| 11 | ≤4 | ≤1 | ≤1 | ≤1 | ≤0,5 | ≤0,25 | ≤0,25 | ≤2 | ≤1 | 8 | ≤0,25 | 1 |
| 12 | b.d. | ≤1 | ≤1 | ≤1 | ≤0,5 | 2 | ≤0,25 | ≤2 | ≤1 | ≤1 | ≤0,25 | ≤0,5 |
| 13 | b.d. | ≤1 | ≤1 | ≤1 | ≤0,5 | 0,5 | ≤0,25 | ≤2 | ≤1 | ≤1 | ≤0,25 | ≤0,5 |
| 14 | ≤4 | ≤1 | ≤1 | ≤1 | ≤0,5 | ≤0,25 | ≤0,25 | ≤2 | ≤1 | ≤1 | ≤0,25 | 2 |
| 15 | ≤4 | ≤1 | ≤1 | ≤1 | ≤0,5 | 0,5 | ≤0,25 | ≤2 | ≤1 | ≤1 | ≤0,25 | 1 |
| 16 | ≥128 | 8 | 2 | ≤1 | ≤0,5 | 2 | 8 | 16 | ≥16 | ≥16 | 1 | 2 |
| 18 | ≥128 | 8 | 2 | ≤1 | ≤0,5 | ≥16 | ≥16 | 16 | ≥16 | ≥16 | 1 | 2 |
| 19 | ≤4 | ≤1 | ≤1 | ≤1 | ≤0,5 | 1 | ≤0,25 | 4 | ≤1 | 8 | ≤0,25 | 1 |
| 21 | ≤4 | ≤1 | ≤1 | ≤1 | ≤0,5 | 0,5 | ≤0,25 | 4 | ≤1 | 4 | ≤0,25 | 1 |
| 22 | 16 | 2 | ≤1 | ≤1 | ≤0,5 | 0,5 | ≤0,25 | 8 | ≥16 | ≥16 | 2 | ≥8 |
| 23 | ≤4 | ≤1 | ≤1 | ≤1 | ≤0,5 | ≤0,25 | ≤0,25 | ≤2 | ≤1 | ≤1 | ≤0,25 | 2 |
| 24 | ≤4 | ≤1 | ≤1 | ≤1 | ≤0,5 | 0,5 | ≤0,25 | ≤2 | ≤1 | 8 | 1 | 2 |
| 25 | ≤4 | ≤1 | ≤1 | ≤1 | ≤0,5 | ≤0,25 | ≤0,25 | ≤2 | ≤1 | ≤1 | ≤0,25 | ≤0,5 |
| 27 | 8 | ≤1 | ≤1 | ≤1 | ≤0,5 | ≤0,25 | ≤0,25 | 8 | ≥16 | ≥16 | ≥4 | 4 |
| 28 | 4 | ≤1 | ≤1 | ≤1 | ≤0,5 | ≤0,25 | ≤0,25 | 4 | ≥16 | ≥16 | 1 | 2 |
| 29 | ≤4 | ≤1 | ≤1 | ≤1 | ≤0,5 | 0,5 | ≤0,25 | ≤2 | ≤1 | ≤1 | ≤0,25 | 1 |
| 31 | ≤4 | ≥64 | 4 | 16 | ≤0,5 | 2 | ≤0,25 | ≥64 | ≥16 | ≥16 | 2 | 1 |
| 32 | b.d. | ≤1 | ≤1 | ≤1 | ≤0,5 | ≤0,25 | ≤0,25 | 8 | ≥16 | ≥16 | 0,5 | 1 |
| 33 | 16 | 2 | ≤1 | ≤1 | ≤0,5 | 1 | ≤0,25 | 8 | ≥16 | ≥16 | 1 | 4 |
| 34 | ≤4 | ≤1 | ≤1 | ≤1 | ≤0,5 | ≤0,25 | ≤0,25 | ≤2 | ≤1 | ≤1 | ≤0,25 | 4 |
| 35 | ≤4 | ≤1 | ≤1 | ≤1 | ≤0,5 | 0,5 | ≤0,25 | ≤2 | ≤1 | 2 | ≤0,25 | 1 |
| 36 | ≤4 | ≤1 | ≤1 | ≤1 | ≤0,5 | 0,5 | ≤0,25 | ≤2 | ≤1 | ≤1 | ≤0,25 | 2 |
| 37 | ≤4 | ≤1 | ≤1 | ≤1 | ≤0,5 | ≤0,25 | ≤0,25 | ≤2 | ≤1 | ≤1 | ≤0,25 | 1 |
| 38 | ≤4 | ≤1 | ≤1 | ≤1 | ≤0,5 | 0,5 | ≤0,25 | ≤2 | ≤1 | ≤1 | ≤0,25 | 2 |
| 39 | 8 | 2 | ≤1 | ≤1 | ≤0,5 | ≤0,25 | ≤0,25 | ≤2 | ≤1 | ≤1 | ≤0,25 | 2 |
| 40 | 16 | 4 | ≤1 | ≤1 | ≤0,5 | 0,5 | ≤0,25 | 16 | ≥16 | ≥16 | 0,5 | 1 |
| 41 | 8 | ≤1 | ≤1 | ≤1 | ≤0,5 | 1 | ≤0,25 | ≤2 | ≤1 | ≤1 | 1 | 2 |
| 42 | ≤4 | ≤1 | ≤1 | ≤1 | ≤0,5 | 0,5 | ≤0,25 | ≤2 | ≤1 | 2 | ≤0,25 | 1 |
| 43 | 8 | 8 | ≥64 | ≤1 | ≤0,5 | 1 | ≤0,25 | 16 | ≤1 | ≥16 | ≤0,25 | 1 |
| 44 | 8 | ≥64 | 16 | 4 | ≤0,5 | 1 | ≤0,25 | 16 | ≥16 | ≥16 | ≤0,25 | 2 |
| 45 | ≤4 | ≤1 | ≤1 | ≤1 | ≤0,5 | 1 | ≤0,25 | ≤2 | ≤1 | ≤1 | ≤0,25 | 2 |
| 46 | ≤4 | ≤1 | ≤1 | ≤1 | ≤0,5 | 0,5 | ≤0,25 | ≤2 | ≤1 | ≤1 | ≤0,25 | ≤0,5 |
| 47 | ≤4 | ≤1 | ≤1 | ≤1 | ≤0,5 | 1 | ≤0,25 | 4 | ≤1 | 2 | ≤0,25 | 2 |
| 48 | ≤4 | ≤1 | ≤1 | ≤1 | ≤0,5 | 1 | ≤0,25 | ≤2 | ≤1 | ≤1 | ≤0,25 | 2 |
| 49 | ≤4 | ≤1 | ≤1 | ≤1 | ≤0,5 | 0,5 | ≤0,25 | ≤2 | ≤1 | ≤1 | ≤0,25 | 2 |
| 50 | 8 | 2 | ≤1 | ≤1 | ≤0,5 | 0,5 | ≤0,25 | ≤2 | ≤1 | ≤1 | ≤0,25 | 2 |
| 51 | ≤4 | ≤1 | ≤1 | ≤1 | ≤0,5 | ≤0,25 | ≤0,25 | ≤2 | ≤1 | ≤1 | ≤0,25 | 2 |
| 53 | ≤4 | ≤1 | ≤1 | ≤1 | ≤0,5 | 0,5 | ≤0,25 | ≤2 | ≤1 | ≤1 | ≤0,25 | ≤0,5 |
| 54 | 8 | ≤1 | ≤1 | ≤1 | ≤0,5 | ≤0,25 | ≤0,25 | 16 | ≥16 | ≥16 | 1 | 4 |
| 55 | ≤4 | ≤1 | ≤1 | ≤1 | ≤0,5 | ≤0,25 | ≤0,25 | ≤2 | ≤1 | ≤1 | ≤0,25 | 4 |
| 56 | ≤4 | ≤1 | ≤1 | ≤1 | ≤0,5 | ≤0,25 | ≤0,25 | ≤2 | ≤1 | ≤1 | ≤0,25 | ≤0,5 |
| 57 | ≤4 | ≤1 | ≤1 | ≤1 | ≤0,5 | 1 | ≤0,25 | ≤2 | ≤1 | 2 | 1 | 2 |
| 58 | ≤4 | ≤1 | ≤1 | ≤1 | ≤0,5 | ≤0,25 | ≤0,25 | ≤2 | ≤1 | ≤1 | ≤0,25 | 2 |
| 59 | ≤4 | ≤1 | ≤1 | ≤1 | ≤0,5 | ≤0,25 | ≤0,25 | ≤2 | ≤1 | ≤1 | ≤0,25 | 2 |
| 60 | ≤4 | ≤1 | ≤1 | ≤1 | ≤0,5 | 0,5 | ≤0,25 | ≤2 | ≤1 | 2 | ≤0,25 | 2 |
| 61 | ≤4 | ≤1 | ≤1 | ≤1 | ≤0,5 | ≤0,25 | ≤0,25 | 4 | ≥16 | ≥16 | 1 | 2 |
| 62 | ≤4 | ≤1 | ≤1 | ≤1 | ≤0,5 | 0,5 | ≤0,25 | ≤2 | ≤1 | ≤1 | ≤0,25 | 2 |
| 63 | ≤4 | ≤1 | ≤1 | ≤1 | ≤0,5 | ≤0,25 | ≤0,25 | ≤2 | ≤1 | ≤1 | ≤0,25 | 1 |
| 64 | 32 | ≥64 | 4 | 16 | ≤0,5 | 1 | ≤0,25 | 16 | ≥16 | ≥16 | ≥4 | 4 |
| 65 | 8 | ≤1 | ≤1 | ≤1 | ≤0,5 | 1 | ≤0,25 | ≤2 | ≤1 | ≤1 | ≤0,25 | 2 |
| 66 | 8 | ≤1 | ≤1 | ≤1 | ≤0,5 | ≤0,25 | ≤0,25 | 8 | ≥16 | ≥16 | 1 | 2 |
| 67 | ≤4 | ≤1 | ≤1 | ≤1 | ≤0,5 | 0,5 | ≤0,25 | ≤2 | ≤1 | 2 | ≤0,25 | - |
| 68 | ≤4 | ≤1 | ≤1 | ≤1 | ≤0,5 | 0,5 | ≤0,25 | ≤2 | ≤1 | ≤1 | ≤0,25 | 2 |
| 69 | b.d. | ≤1 | ≤1 | ≤1 | ≤0,5 | 1 | ≤0,25 | ≤2 | ≤1 | ≤1 | ≤0,25 | ≤0,5 |
| 70 | ≤4 | ≤1 | ≤1 | ≤1 | ≤0,5 | ≤0,25 | ≤0,25 | ≤2 | ≤1 | ≤1 | ≤0,25 | 2 |
| 71 | b.d. | ≤1 | ≤1 | ≤1 | ≤0,5 | 1 | ≤0,25 | ≤2 | ≤1 | ≤1 | ≤0,25 | ≤0,5 |
| 72 | ≤4 | ≤1 | ≤1 | ≤1 | ≤0,5 | 0,5 | ≤0,25 | ≤2 | ≤1 | ≤1 | ≤0,25 | 2 |
| 73 | ≤4 | ≤1 | ≤1 | ≤1 | ≤0,5 | 0,5 | ≤0,25 | ≤2 | ≤1 | ≤1 | ≤0,25 | 2 |
| 74 | ≤4 | 2 | ≤1 | ≤1 | ≤0,5 | 1 | ≤0,25 | 16 | ≤1 | ≥16 | ≥4 | ≥8 |
| 75 | ≤4 | ≤1 | ≤1 | ≤1 | ≤0,5 | 0,5 | ≤0,25 | ≤2 | ≤1 | ≤1 | ≤0,25 | 2 |
| 77 | ≤4 | ≤1 | ≤1 | ≤1 | ≤0,5 | ≤0,25 | ≤0,25 | ≤2 | ≤1 | 2 | ≤0,25 | 1 |
| 78 | ≥128 | 8 | ≤1 | ≤1 | ≤0,5 | 2 | ≤0,25 | 16 | ≤1 | ≥16 | 1 | 2 |
| 79 | b.d. | ≤1 | ≤1 | ≤1 | ≤0,5 | 1 | ≤0,25 | ≤2 | ≤1 | ≤1 | ≤0,25 | ≤0,5 |
| 80 | ≤4 | ≤1 | ≤1 | ≤1 | ≤0,5 | 0,5 | ≤0,25 | ≤2 | ≤1 | ≤1 | ≤0,25 | 2 |
| 81 | ≥128 | ≥64 | ≥64 | ≥64 | ≥8 | 1 | 2 | ≥64 | ≥16 | ≥16 | 1 | 1 |
| 82 | ≥128 | ≥64 | ≥64 | ≥64 | ≥8 | 2 | 2 | ≥64 | ≥16 | ≥16 | 2 | 2 |
| 83 | 16 | ≥64 | 4 | 16 | ≤0,5 | 0,5 | ≤0,25 | ≥64 | ≥16 | ≥16 | ≥4 | 2 |
| 84 | 16 | ≥64 | 4 | 16 | ≤0,5 | 0,5 | ≤0,25 | ≤2 | ≥16 | 8 | ≥4 | 4 |
| 85 | ≥128 | ≥64 | 16 | ≥64 | 4 | 1 | 0,5 | ≥64 | ≥16 | ≥16 | ≥4 | 4 |
| 86 | ≤4 | ≤1 | ≤1 | ≤1 | ≤0,5 | 0,5 | ≤0,25 | ≤2 | ≤1 | 2 | ≤0,25 | 2 |
| 87 | 16 | ≥64 | 4 | 8 | ≤0,5 | ≤0,25 | ≤0,25 | ≥64 | ≥16 | ≥16 | ≥4 | 2 |
| 88 | ≥128 | ≥64 | 4 | ≥64 | 1 | ≤0,25 | ≤0,25 | ≤2 | ≥16 | ≥16 | ≥4 | 4 |
| 89 | ≤4 | 8 | ≥64 | 1 | ≤0,5 | ≤0,25 | ≤0,25 | 4 | ≤1 | 8 | 2 | 2 |
| 90 | 8 | 2 | ≤1 | ≤1 | ≤0,5 | ≤0,25 | ≤0,25 | ≥64 | ≥16 | ≥16 | ≥4 | 2 |
| 91 | 16 | ≥64 | 4 | ≥64 | ≤0,5 | 2 | ≤0,25 | ≤2 | ≤1 | ≤1 | ≥4 | ≥8 |
| 92 | ≤4 | ≤1 | ≤1 | ≤1 | ≤0,5 | ≤0,25 | ≤0,25 | ≤2 | ≤1 | 2 | ≤0,25 | 2 |
| 93 | ≤4 | ≤1 | ≤1 | ≤1 | ≤0,5 | ≤0,25 | ≤0,25 | ≤2 | ≤1 | 2 | ≤0,25 | 2 |
| 94 | ≤4 | ≤1 | ≤1 | ≤1 | ≤0,5 | 0,5 | ≤0,25 | ≤2 | ≤1 | 4 | ≤0,25 | 2 |
| 95 | ≤4 | ≤1 | ≤1 | ≤1 | ≤0,5 | ≤0,25 | ≤0,25 | ≤2 | ≤1 | ≤1 | ≤0,25 | 2 |
| 96 | 8 | ≥64 | 4 | ≥64 | ≤0,5 | 1 | ≤0,25 | ≤2 | ≤1 | ≤1 | ≥4 | 4 |
| 97 | ≤4 | ≤1 | ≤1 | ≤1 | ≤0,5 | ≤0,25 | ≤0,25 | ≤2 | ≤1 | ≤1 | ≤0,25 | 2 |
| 98 | 64 | ≥64 | ≥64 | ≥64 | 4 | 1 | 1 | ≥64 | ≥16 | ≥16 | ≥4 | 1 |
| 99 | 16 | ≥64 | 2 | 8 | ≤0,5 | 1 | ≤0,25 | ≥64 | ≥16 | ≥16 | ≥4 | 2 |
| 100 | ≤4 | ≤1 | ≤1 | ≤1 | ≤0,5 | 0,5 | ≤0,25 | ≤2 | ≤1 | ≤1 | ≤0,25 | 2 |
| 101 | b.d. | ≤1 | ≤1 | ≤1 | ≤0,5 | 1 | ≤0,25 | ≤2 | ≤1 | ≤1 | ≤0,25 | 2 |
| 103 | ≤4 | ≤1 | ≤1 | ≤1 | ≤0,5 | 1 | ≤0,25 | ≤2 | ≤1 | ≤1 | ≤0,25 | 2 |
| 104 | ≤4 | ≤1 | ≤1 | ≤1 | ≤0,5 | 0,5 | ≤0,25 | ≤2 | ≤1 | ≤1 | ≤0,25 | 2 |
| 105 | ≤4 | ≥64 | ≤1 | 8 | ≤0,5 | 0,5 | ≤0,25 | ≥64 | ≥16 | ≥16 | ≥4 | 1 |
| 107 | ≥128 | 8 | ≤1 | ≤1 | ≤0,5 | 1 | ≤0,25 | 16 | ≤1 | ≥16 | 1 | 2 |
| 108 | ≥128 | 8 | ≤1 | ≤1 | ≤0,5 | 2 | ≤0,25 | 16 | ≤1 | ≥16 | 1 | 2 |
| 109 | ≥128 | 8 | ≤1 | ≤1 | ≤0,5 | 2 | ≤0,25 | 16 | ≤1 | ≥16 | 1 | 2 |
| 110 | ≥128 | 8 | ≤1 | ≤1 | ≤0,5 | 2 | ≤0,25 | 16 | ≤1 | ≥16 | 1 | 2 |
| 111 | ≥128 | 8 | ≤1 | ≤1 | ≤0,5 | 2 | ≤0,25 | 16 | ≤1 | ≥16 | 1 | 2 |
| 112 | ≤4 | ≤1 | ≤1 | ≤1 | ≤0,5 | 0,5 | ≤0,25 | ≤2 | ≤1 | ≤1 | ≤0,25 | 2 |
| 113 | ≤4 | ≤1 | ≤1 | ≤1 | ≤0,5 | 0,5 | ≤0,25 | ≤2 | ≤1 | ≤1 | ≤0,25 | 2 |
| 114 | ≤4 | ≤1 | ≤1 | ≤1 | ≤0,5 | 0,5 | ≤0,25 | ≤2 | ≤1 | ≤1 | 1 | ≤0,5 |
| 115 | ≤4 | ≥64 | ≤1 | 32 | ≤0,5 | 1 | ≤0,25 | ≤2 | ≥16 | 8 | 1 | 1 |
| 116 | ≤4 | ≤1 | ≤1 | ≤1 | ≤0,5 | 2 | ≤0,25 | ≤2 | ≤1 | ≤1 | ≤0,25 | 2 |
| 117 | ≤4 | ≤1 | ≤1 | ≤1 | ≤0,5 | 1 | ≤0,25 | ≤2 | ≤1 | ≤1 | ≤0,25 | 2 |
| 118 | ≤4 | ≤1 | ≤1 | ≤1 | ≤0,5 | ≤0,25 | ≤0,25 | ≤2 | ≤1 | ≤1 | ≤0,25 | 2 |
| 119 | ≤4 | ≤1 | ≤1 | ≤1 | ≤0,5 | 0,5 | ≤0,25 | ≤2 | ≤1 | ≤1 | ≤0,25 | 2 |
| 120 | 64 | ≥64 | ≥64 | 8 | ≤0,5 | 1 | ≤0,25 | ≤2 | ≥16 | 8 | ≤0,25 | 2 |
